# Supplementary material
Source: PubMed Central journal article supplement (PMC7832566)
Supplement: mmc1.pdf [file mmc1.pdf]

**Supplemental Information**

**MDA5 Governs the Innate Immune Response  
to SARS-CoV-2 in Lung Epithelial Cells**

**Xin Yin, Laura Riva, Yuan Pu, Laura Martin-Sancho, Jun Kanamune, Yuki Yamamoto, Kouji Sakai, Shimpei Gotoh, Lisa Miorin, Paul D. De Jesus, Chih-Cheng Yang, Kristina M. Herbert, Sunnie Yoh, Judd F. Hultquist, Adolfo García-Sastre, and Sumit K. Chanda**

**Fig S1****A**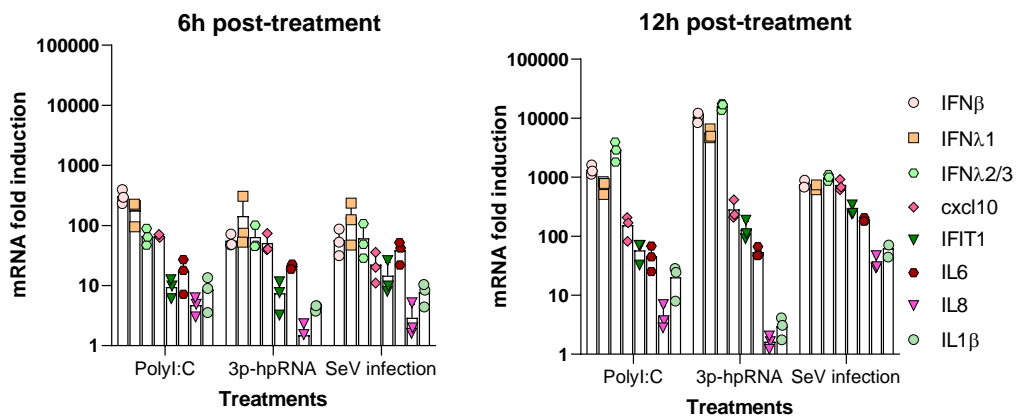**B**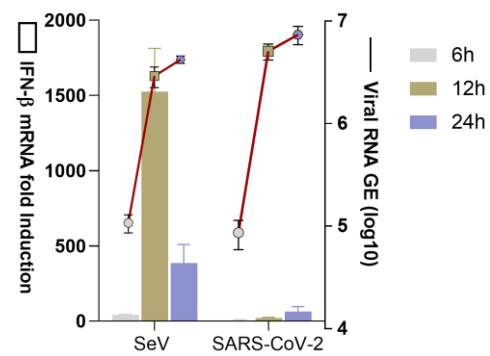**C**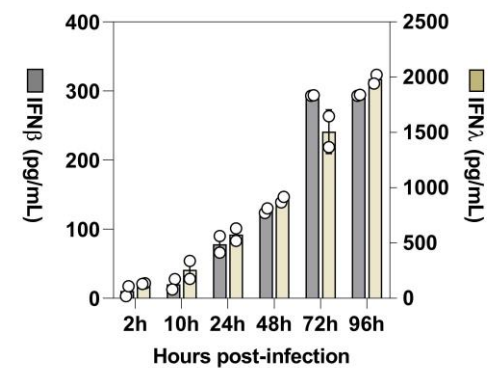**D**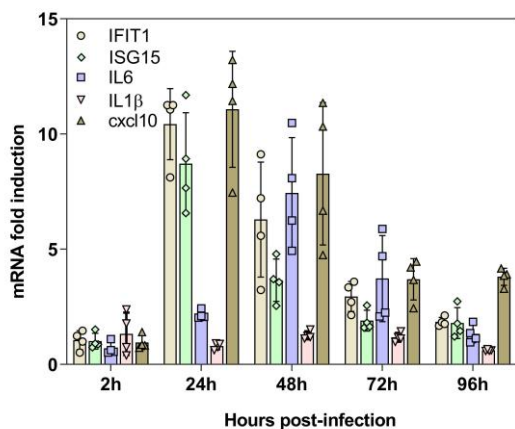**E**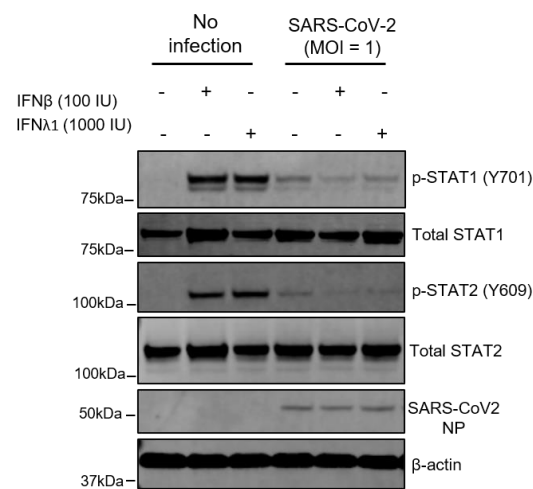**F**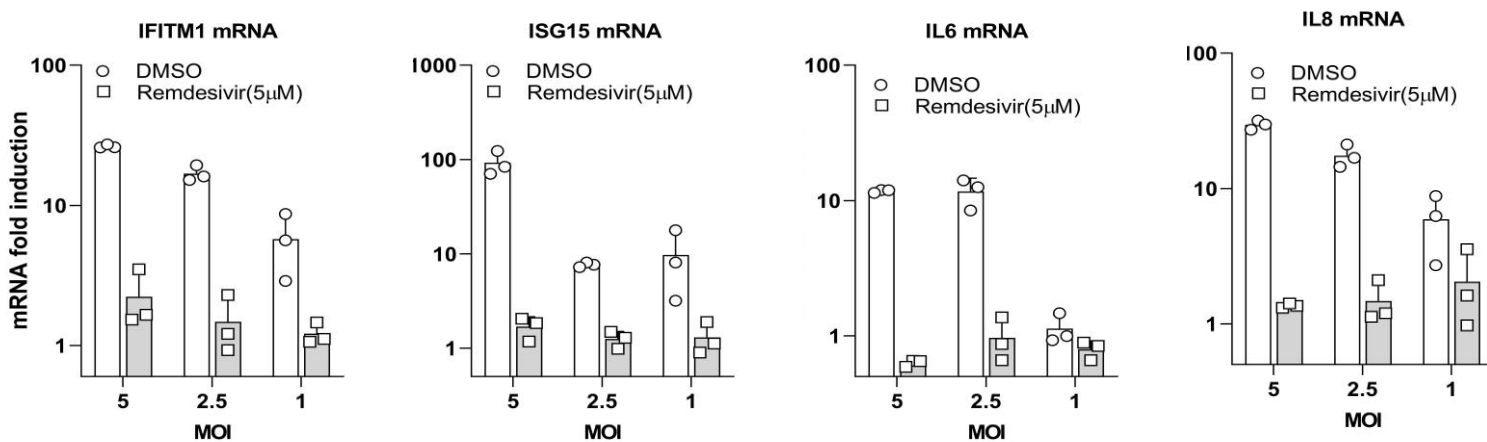

**Figure S1: The innate immune response in Calu-3 cells upon stimulation (related to Figure 1).** (A) Calu-3 cells were either transfected with poly IC (5 µg/mL) or 3p-hpRNA (2.5 µg/mL) or were infected with 100 hemagglutinin units/ml of Sendai virus (SeV) for activation of MDA5 and RIG-I signaling. After 6h or 12 h, the intracellular mRNA was extracted for quantification of mRNA levels of IFNs, ISGs, and proinflammatory cytokines by qRT-PCR. Data are expressed as fold changes relative to mock transfected cells and the results show the mean ± SEM of three independent experiments. (B) Calu3 cells were infected with equal amount (100 GE/cell) of Sendai virus and SARS-CoV-2, the cells were collected for quantification of IFN-β and viral mRNAs by qRT-PCR at the indicated time points. (C) Kinetics of IFN secretion responses in infected cells. Concentrations of IFN-β and IFN-λ in the culture supernatants were measured by specific ELISA, respectively. The results show the mean ± SEM of the average of the duplicates in each of 2 independent experiments. (D) The kinetics for the expression of mRNAs encoding different ISGs upon SARS-COV-2 infection of Calu-3 cells are shown. Data are expressed as fold change relative to mock-infected cells. (E) Calu-3 cells infected with SARS-CoV-2 at an MOI of 1.0 for 48 hours were treated with either IFNβ (100 IU) or IFNλ1 (1000 IU) for 3 hours prior to detection of protein expression with specific antibodies. (F) Calu-3 cells ( $1 \times 10^5$ ) were infected with SARS-CoV-2 at the indicated MOI in the presence of remdesivir for 48 hours. The induction of ISGs and proinflammatory cytokines was quantified by qRT-PCR. Data are expressed as fold change relative to mock-infected cells.

**Fig S2**

**A**

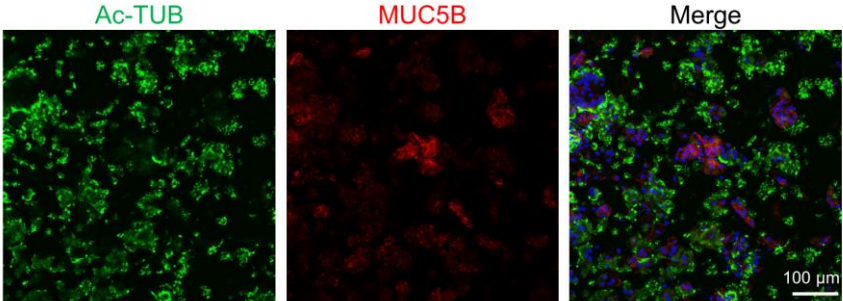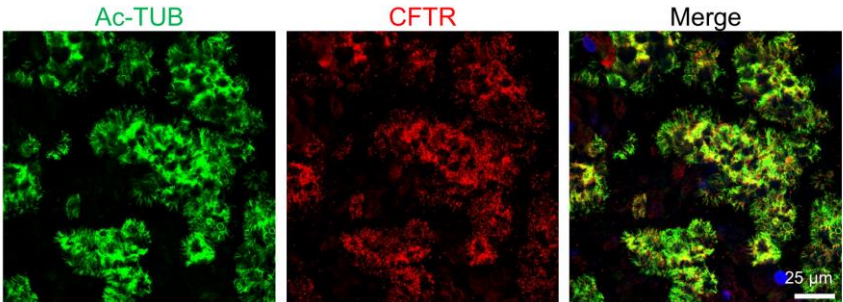

**B**

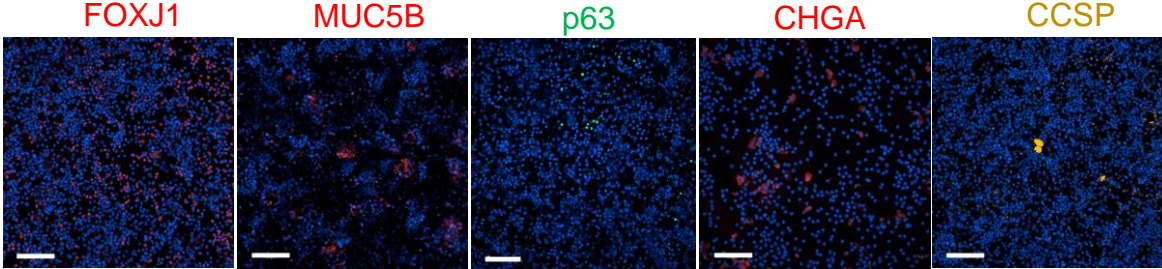

**C**

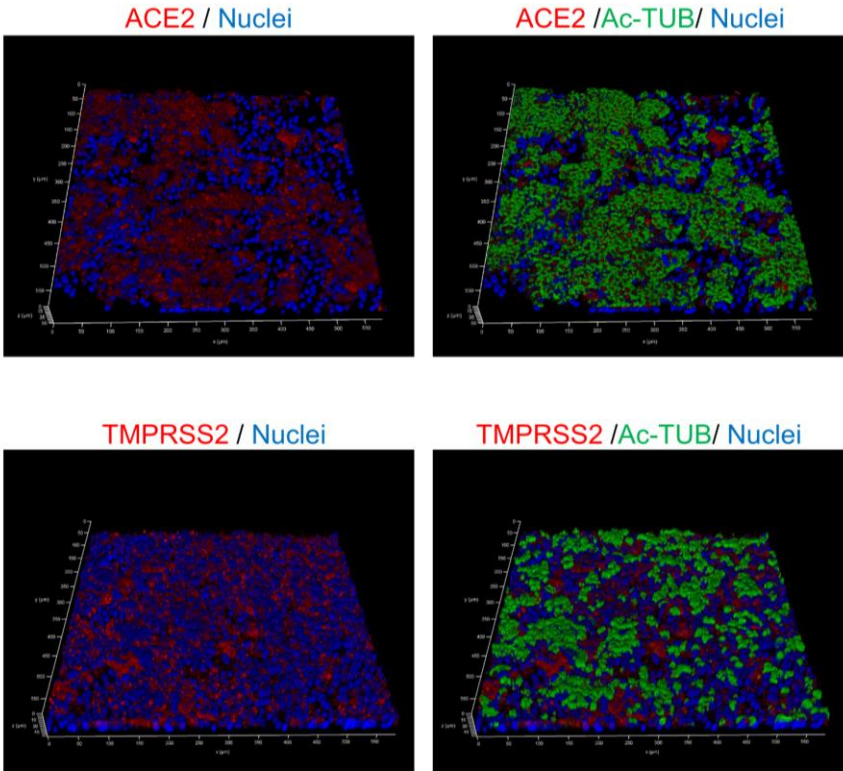

**Figure S2: Characterization of iPSC-derived airway epithelial cell model (related to Figure 2).** (A) Immunofluorescent analysis of iPSC-derived airway epithelial cells by confocal microscopy. Nuclei were counterstained with DAPI. Acetylated tubulin (Ac-TUB) + ciliated cells and MUC5B+ mucus producing cells were observed. Expression of cystic fibrosis transmembrane conductance regulator (CFTR) was recognized on the apical side of ciliated cells. (B) Representative immunofluorescent images of iPSC-derived airway epithelial cells for quantification of each markers. FoxJ1(Red), a marker for ciliated cells, MUC5B (Red, a marker for goblet cells), p63 (Green, a marker for basal cells), CHGA (Red, a marker for neuroendocrine cells). CCSP (Orange, a marker for club cells). Scale bars, 100  $\mu$ m. (C) 3D imaging analysis showed enriched expression of ACE2 and TMPRSS2 on iPSC-derived airway epithelial cells. Expression of ACE2 was localized on the apical side of cells, whereas localization of TMPRSS2 on both apical and lateral side of cells.

Fig S3

A

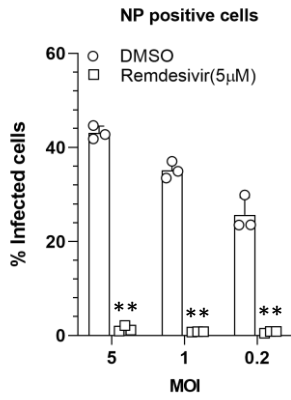

B

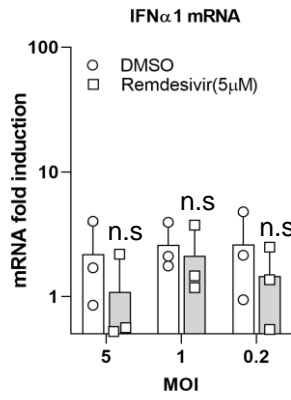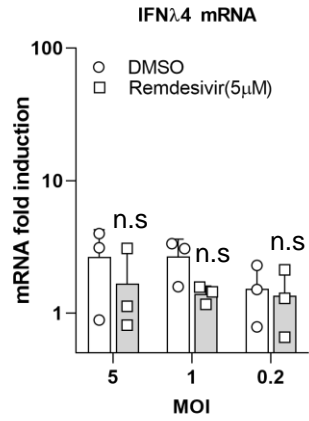

C

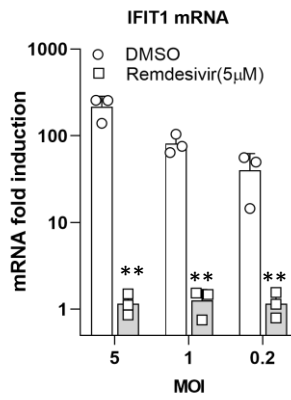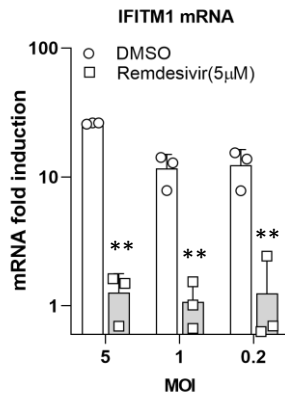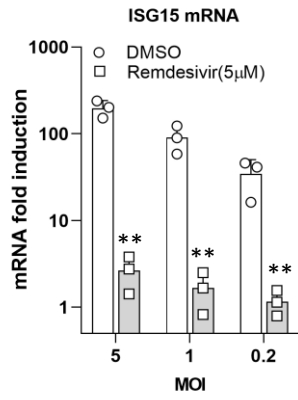

D

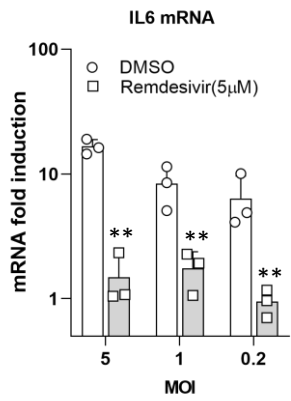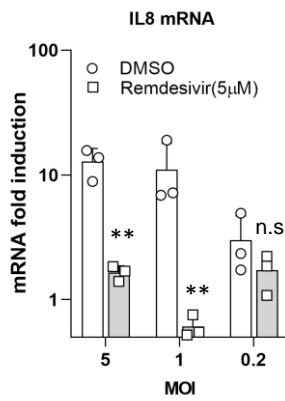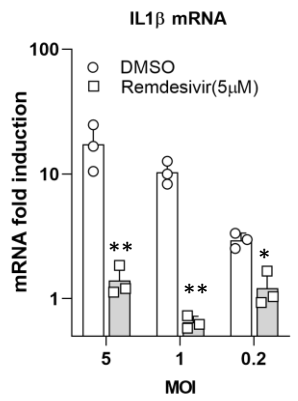

**Figure S3: The IFN response in iPSC-derived airway epithelial cells infected with SARS-CoV-2 (related to Figure 2).**

(A) The percentage of infection was calculated as the ratio between the number of infected cells stained for SARS-CoV-2 NP and the total amount of cells stained with DAPI. Data are from three technical replicates. (B-D) The induction of IFN, ISG and proinflammatory cytokines was quantified by qRT-PCR in SARS-CoV-2 infected iPS cell-derived airway epithelium. Data are expressed as fold change relative to mock-infected cells from three independent experiments with two technical replicates.

**Fig S4**

**A**

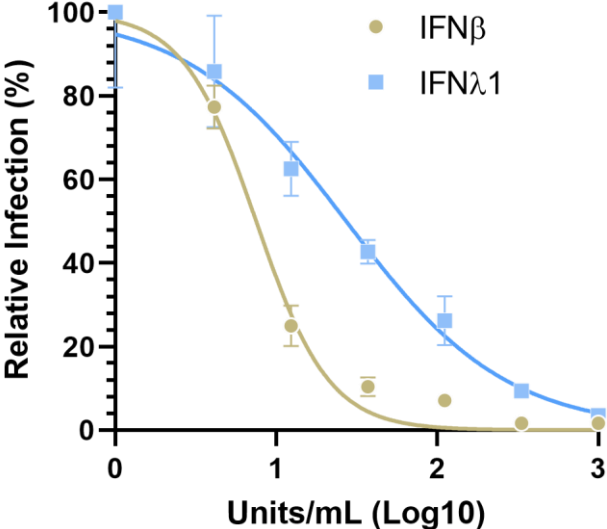

**B**

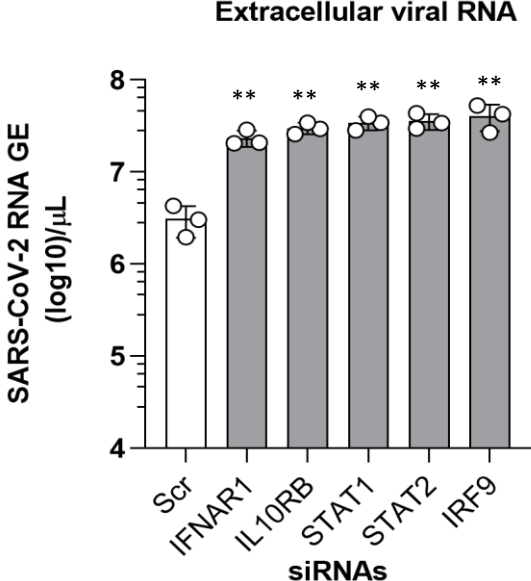



**Figure S4: The antiviral effect of exogenous and endogenous IFNs (related to Figure 3).** (A) Inhibition of SARS-CoV-2 replication in Calu-3 cells by IFN $\beta$  and IFN $\lambda$ . Calu-3 cells were pretreated with IFN $\beta$  or IFN $\lambda$  at indicated concentration for 2 hours prior to infection. After treatment, the cells were infected with SARS-CoV-2 at an MOI of 0.625 for 48 hours. Cells were fixed, and immunostained with rabbit-anti-SARS-CoV-2 NP antibody, and imaged with the Celigo high content imager. Results from duplicate experiments are presented with bars representing standard deviations. (B) The viral RNA in supernatants collected from the infected cells was quantified by qRT-PCR using primers targeting the N2 regions. Data are from three independent experiments with two technical replicates.

**Fig S5**

**A**

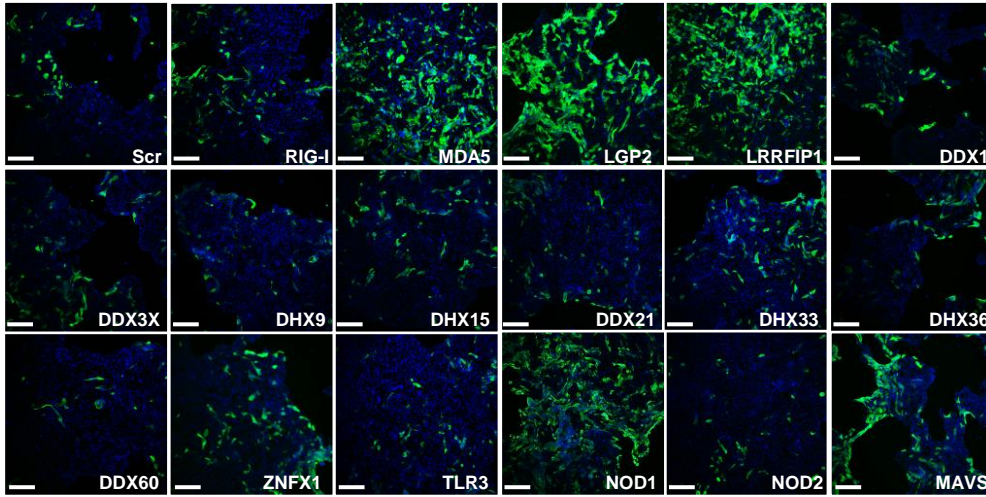

**B**

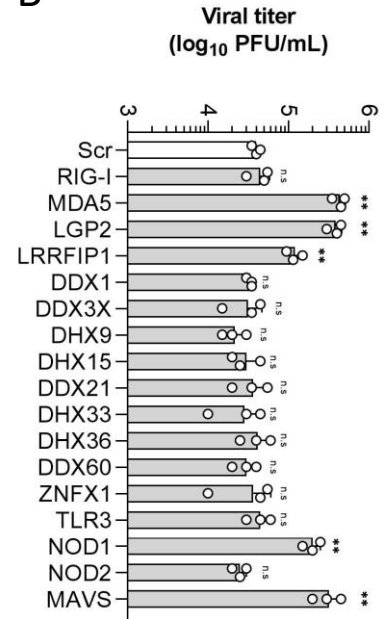

**C**

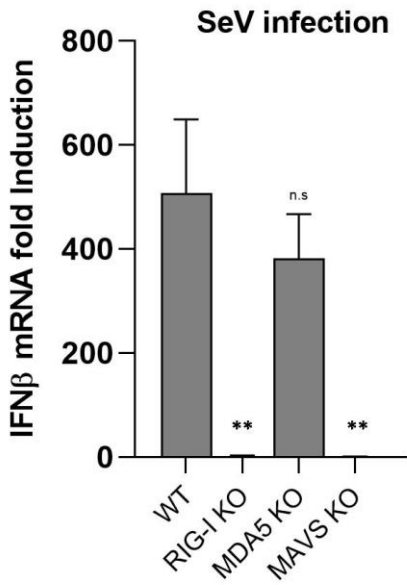

**D**

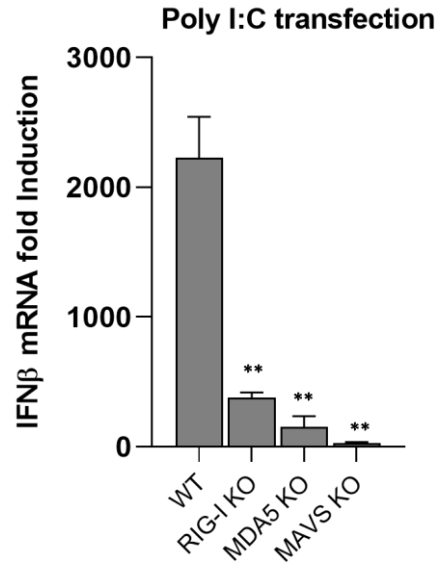

**E**

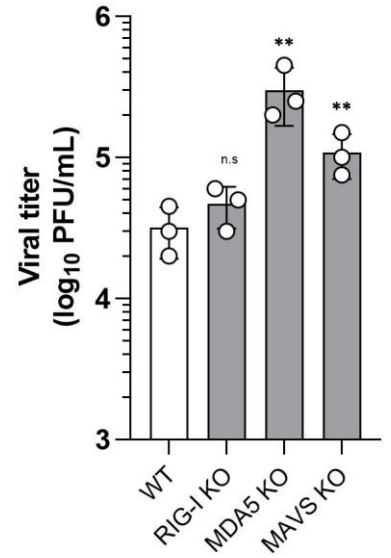

**Figure S5: MDA5/LGP2 are the dominant RNA sensors responsible for innate immune induction in Calu-3 cells infected with SARS-CoV-2 (related to Figure 4).**

(A) Representative immunofluorescence images from Figure 4C are shown. Scale bar, 100  $\mu$ m. (B) Viral titer in the supernatants collected from infected cells (Figure 4C) were determined by plaque assay in vero E6 cells. Data show mean  $\pm$  SD from one representative experiment in triplicate (n=3). (C-D) The cells were either infected with SeV or transfected with poly IC (5 $\mu$ g/mL). Cells were lysed 20 h after SeV infection or 8 h after poly IC transfection for IFN- $\beta$  mRNA quantification. Data are presented as fold changes relative to non-treated cells. (E) The supernatants were collected from the infected cells at 48 h.p.i. Viral titer in the collected supernatants were determined by plaque assay in vero E6 cells. Data show mean  $\pm$  SD from one representative experiment in triplicate (n=3).

**Fig S6**

**A**

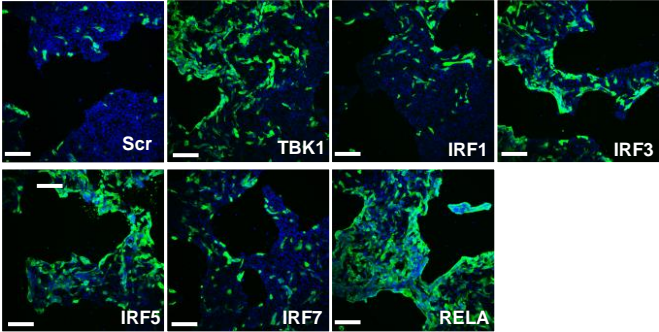

**B**

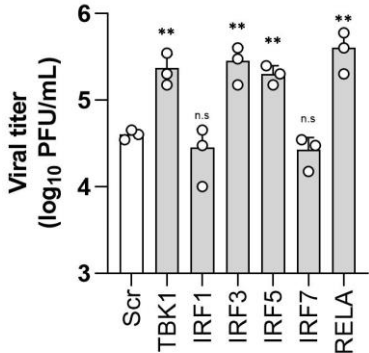

**C**

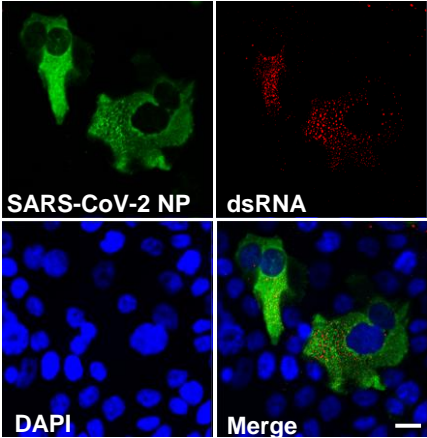

**Figure S6: IRF3, IRF5, and p65 are required for the IFN signaling transduction in response to SARS-CoV-2 infection (related to Figure 5).** (A) Representative immunofluorescence images from Figure 5C are shown. Scale bar, 100  $\mu\text{m}$ . (B) Viral titer in the collected supernatants were determined by plaque assay in vero E6 cells. 100 $\mu\text{L}$  of virus-containing supernatants that were serially diluted 1:10 for inoculation in vero E6 cells. Plaques were quantified and recorded as PFU/mL. Data show mean  $\pm$  SD from one representative experiment in triplicate (n=3). (C) Confocal images showing viral NP and dsRNA in Calu-3 cells infected with SARS-CoV-2 at MOI of 1. Cells were stained 48 hours after infection with a rabbit anti-SARS-CoV-2 NP antibody, and anti-dsRNA [rJ2] antibody, DAPI was used to stain the nuclei. Scale bar, 10  $\mu\text{m}$ .

**Table S1. The primers used for qPCR in this study. Related to STAR Methods**

| <b>Gene name</b> | <b>Sequence (5'-3')</b>                                    |
|------------------|------------------------------------------------------------|
| <b>RIG-I</b>     | F: CACCTCAGTTGCTGATGAAGGC<br>R: GTCAGAAGGAAGCACTTGCTACC    |
| <b>MDA5</b>      | F: GCTGAAGTAGGAGTCAAAGCCC<br>R: CCACTGTGGTAGCGATAAGCAG     |
| <b>LGP2</b>      | F: ATGACCACCTGGAGATGCCTGA<br>R: CATTGTAGCGCCTCAGGTGAAG     |
| <b>LRRFIP1</b>   | F: GAGAGACTTCCGACACCCTCAA<br>R: CACCTCCACTTCACTGGCTCTT     |
| <b>DDX1</b>      | F: AAACCAAGCCCTCTTTCCTGCC<br>R: GCCTTGAAAGAGCAACAAAGCC     |
| <b>DDX3</b>      | F: ACTATGCCTCCAAAGGGTGTCC<br>R: AGAGCCAACTCTTCCTACAGCC     |
| <b>DHX9</b>      | F: AGCTGTGGCTACAGCGTTCGAT<br>R: CTGATTCTCGAATGCCTGCTTC     |
| <b>DHX15</b>     | F: CACTGCTGAACGTCTACCATGC<br>R: CATTGTCTGCGGACATCAGGGA     |
| <b>DDX21</b>     | F: TGGACTCAGAGGGCAGCAGTTA<br>R: TGTCTCCATGCAAGGACTGAGC     |
| <b>DHX33</b>     | F: GAGAGGACAGTGGCATCTGCTA<br>R: GAAGCTGAAGCATCACACTGGC     |
| <b>DHX36</b>     | F: CCCACCATCAAATGAGGCAGTG<br>R: TGTGGCTCAACGGGTAATCGTG     |
| <b>DDX60</b>     | F: GGTGTTTTACCAGGGAGTATCG<br>R: CCAGTTTTGGCGATGAGGAGCA     |
| <b>ZNFX1</b>     | F: TGAGACTCCAGGAAGACCTGCA<br>R: ACAATCCTCGGCTCCACCTTCT     |
| <b>TLR3</b>      | F: GCGCTAAAAAGTGAAGAAGTGGAT<br>R: GCTGGACATTGTTTCAGAAAGAGG |
| <b>NOD1</b>      | F: CAACGGCATCTCCACAGAAGGA<br>R: CCAAACCTCTCTGCCACTTCATCG   |
| <b>NOD2</b>      | F: GCACTGATGCTGGCAAAGAACG<br>R: CTTCAGTCCTTCTGCGAGAGAAC    |
| <b>MAVS</b>      | F: ATGGTGCTCACCAAGGTGTCTG<br>R: TCTCAGAGCTGCTGTCTAGCCA     |
| <b>TBK1</b>      | F: AGATGTGGTGGGTGGAATGA<br>R: ACACAGACTGTCCATCTTCCC        |

---

|                               |                                                            |
|-------------------------------|------------------------------------------------------------|
| <b>IRF1</b>                   | F: GAGGAGGTGAAAGACCAGAGCA<br>R: TAGCATCTCGGCTGGACTTCGA     |
| <b>IRF3</b>                   | F: TCTGCCCTCAACCGCAAAGAAG<br>R: TACTGCCTCCACCATTGGTGTC     |
| <b>IRF5</b>                   | F: TATGCCATCCGCCTGTGTCAGT<br>R: GCCCTTTTGAACAGGATGAGC      |
| <b>IRF7</b>                   | F: CCACGCTATAACCATCTACCTGG<br>R: GCTGCTATCCAGGGAAGACACA    |
| <b>RELA/p65</b>               | F: TGAACCGAAACTCTGGCAGCTG<br>R: CATCAGCTTGCGAAAAGGAGCC     |
| <b>IFNA1</b>                  | F: GCCTCGCCCTTTGCTTTACT<br>R: CTGTGGGTCTCAGGGAGATCA        |
| <b>IFNB1</b>                  | F: ATGACCAACAAGTGTCTCCTCC<br>R: GGAATCCAAGCAAGTTGTAGCTC    |
| <b>IFNL1</b>                  | F: GTGACTTTGGTGCTAGGCTTG<br>R: GCCTCAGGTCCCAATTCCC         |
| <b>IFNL2/3</b>                | F: AGTTCCGGGCCTGTATCCAG<br>R: GAGCCGGTACAGCCAATGGT         |
| <b>IFNL4</b>                  | F: CGATCCTGGAGCTGCTG<br>R: TTTGTGACGCCTCTTCTGG             |
| <b>CXCL10</b>                 | F: GTGGCATTCAAGGAGTACCTC<br>R: GCCTTCGATTCTGGATTCAGACA     |
| <b>ISG15</b>                  | F: GGCTGGGAGCTGACGGTGAAG<br>R: GCTCCGCCCGCCAGGCTCTGT       |
| <b>IFIT1</b>                  | F: AAGCTTGAGCCTCCTTGGGTTCTG<br>R: TCAAAGTCAGCAGCCAGTCTCAGG |
| <b>IFIT2</b>                  | F: CAG CTGAGAATTGCACTGCAA<br>R: GTAGGCTGCTCTCCAAGG AA      |
| <b>IFITM1</b>                 | F: CCAAGGTCCACCGTGATTAAC<br>R: ACCAGTTCAAGAAGAGGGTGTT      |
| <b>IL6</b>                    | F: AGACAGCCACTCACCTCTTCAG<br>R: TTCTGCCAGTGCCTCTTTGCTG     |
| <b>IL-1<math>\beta</math></b> | F: AAGCTGATGGCCCTAAACAG<br>R: AGGTGCATCGTGACATAAG          |
| <b>IL8</b>                    | F: GAGAGTGATTGAGAGTGGACCAC<br>R: CACAACCCTCTGCACCCAGTTT    |
| <b>GAPDH</b>                  | F: CATGAGAAGTATGACAACAGCCT<br>R: AGTCCTTCCACGATACCAAAGT    |

---
